# Supplementary material for: Correlation of distribution characteristics and dynamic changes of gut microbiota with the efficacy of immunotherapy in EGFR-mutated non-small cell lung cancer
Source: PubMed Central journal article supplement (PMC10985957; doi:10.1186/s12967-024-05135-5), 2024-04-02

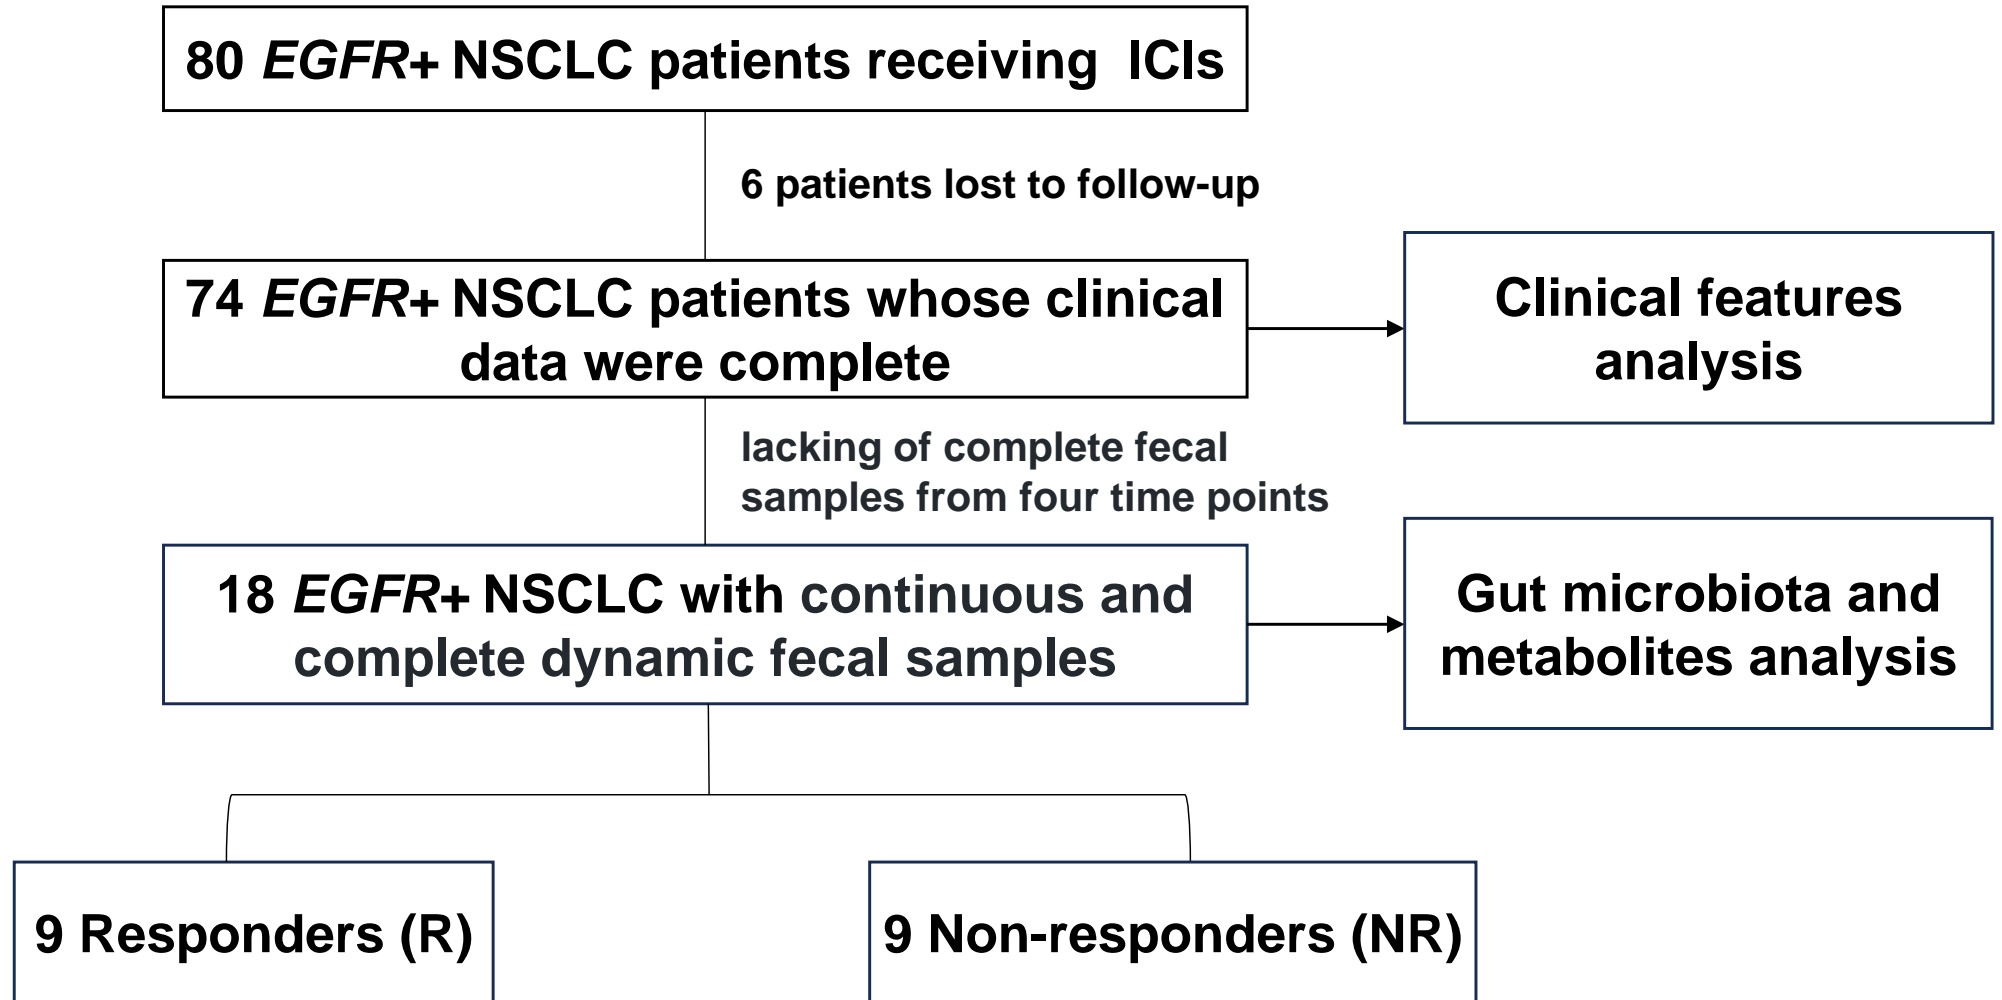

SFig2

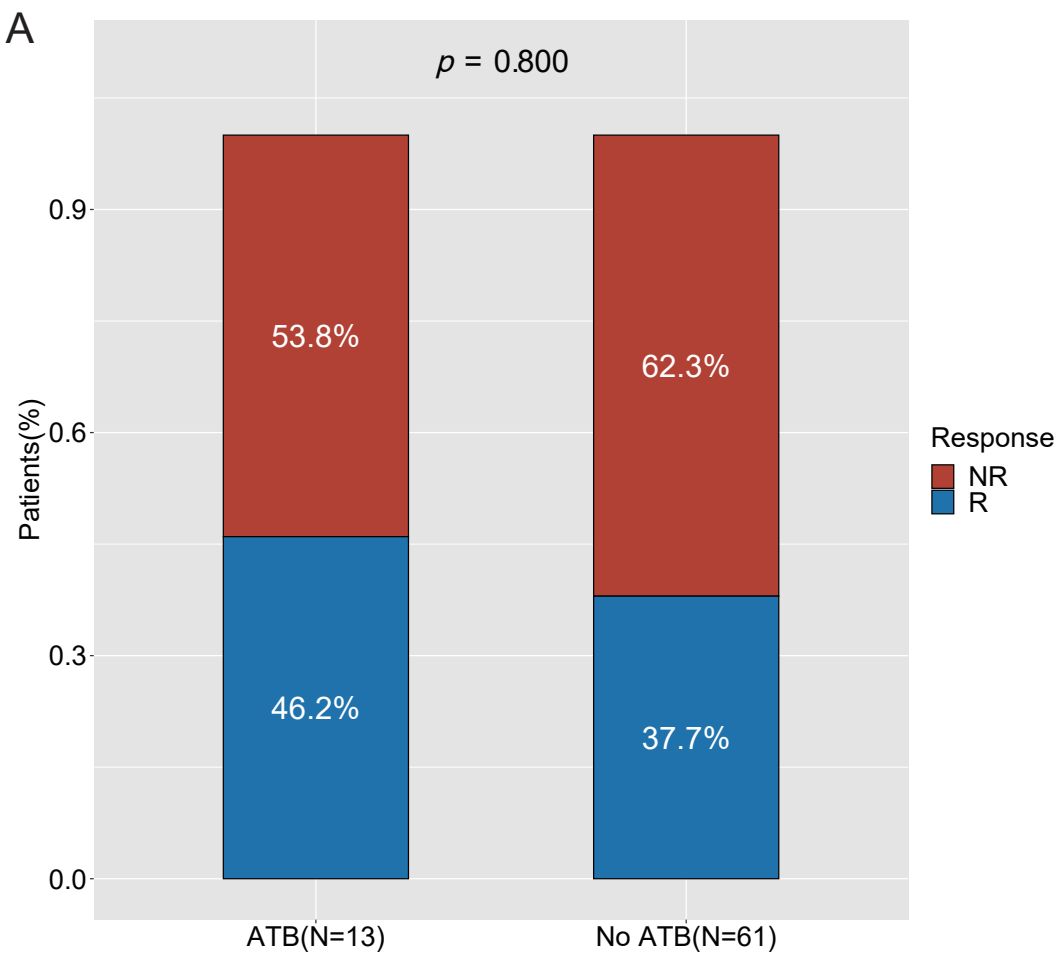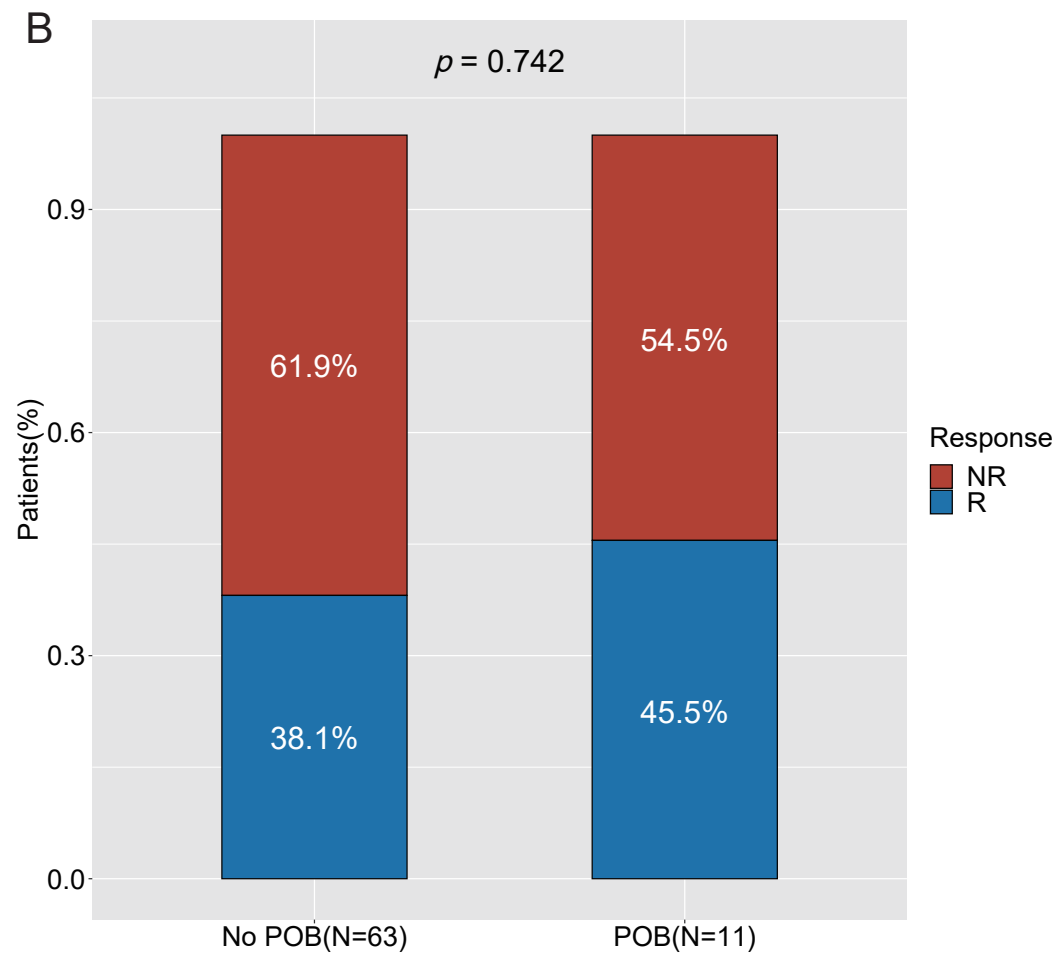

A

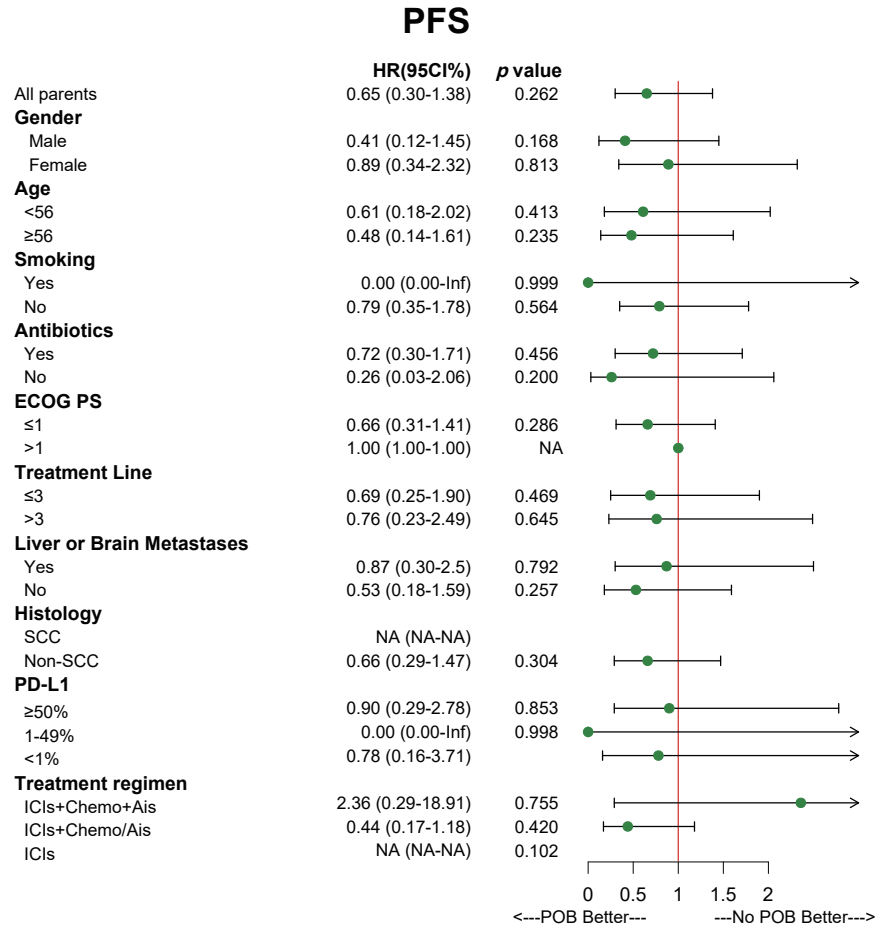

B

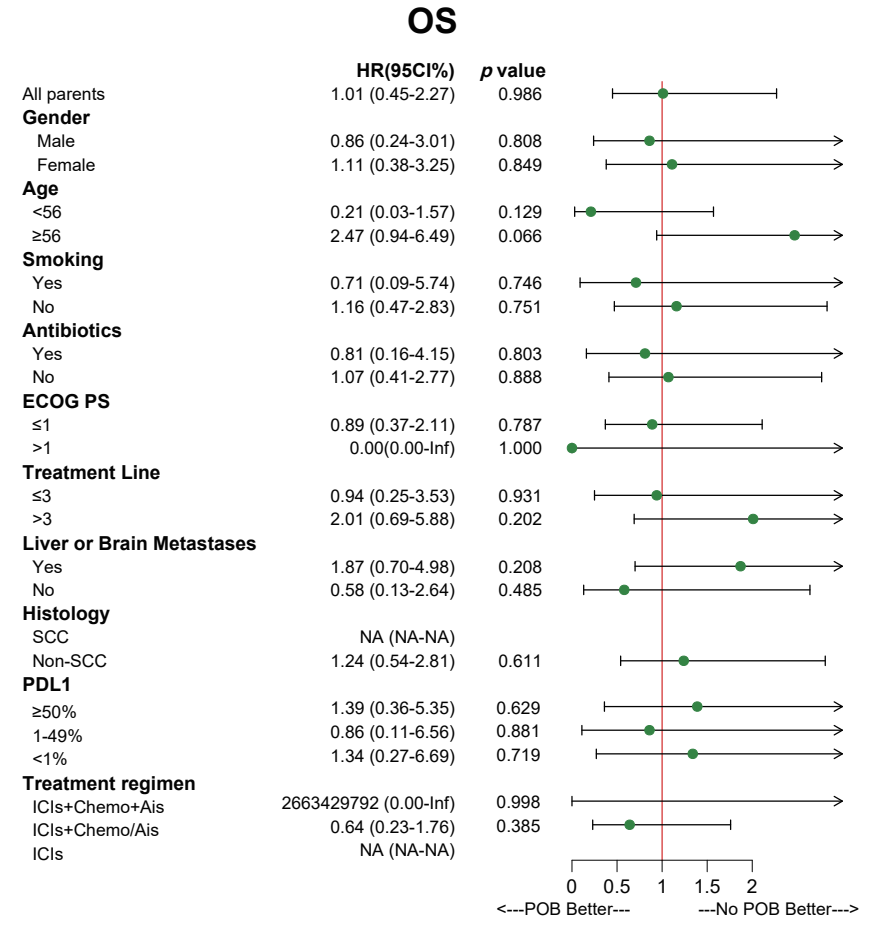

SFig4

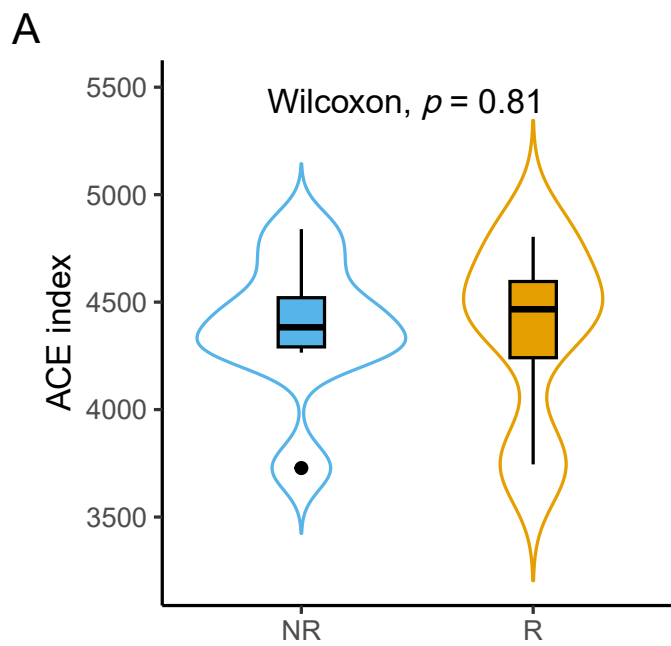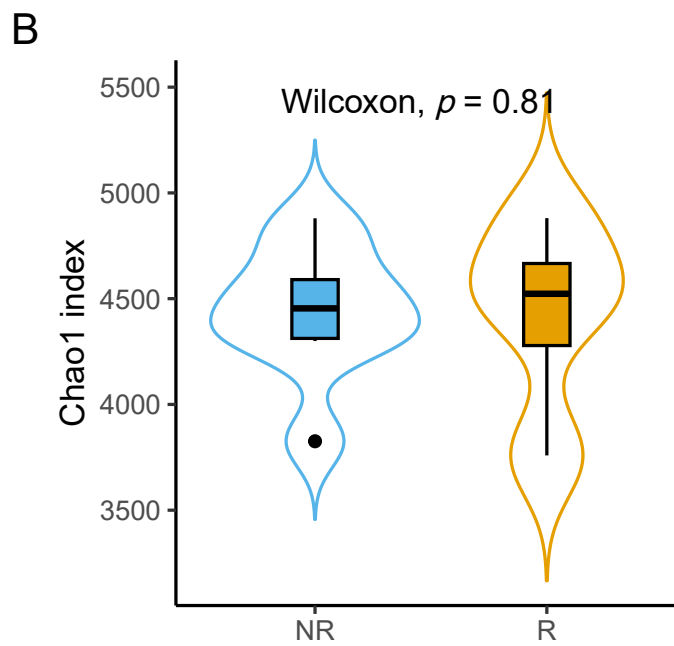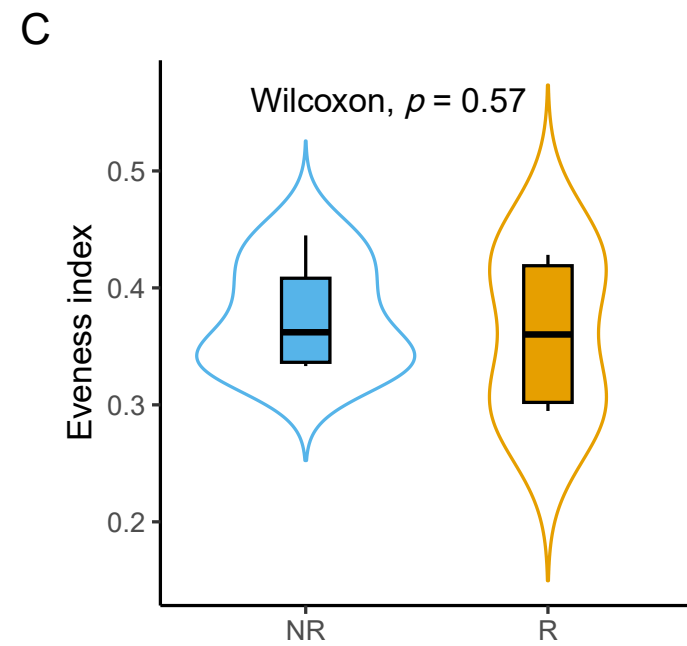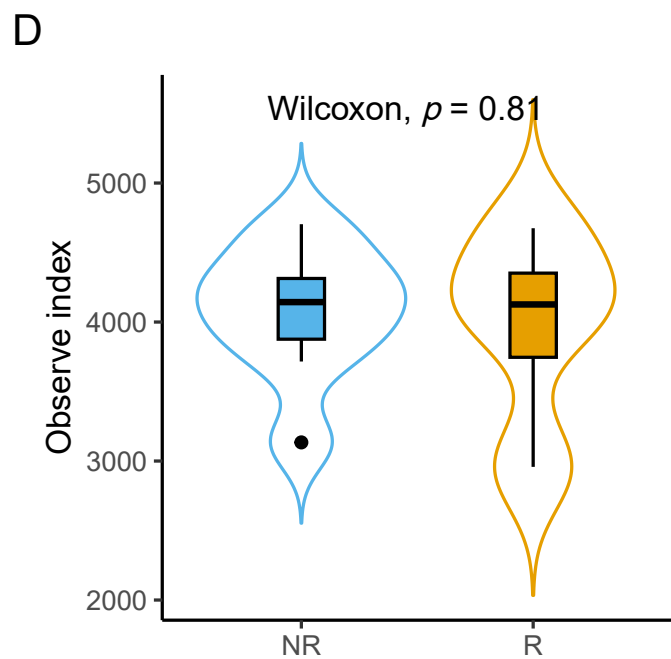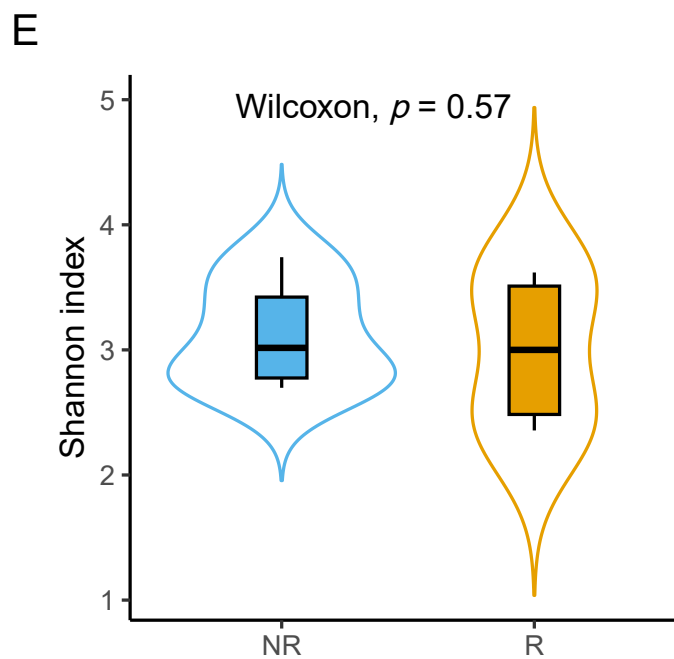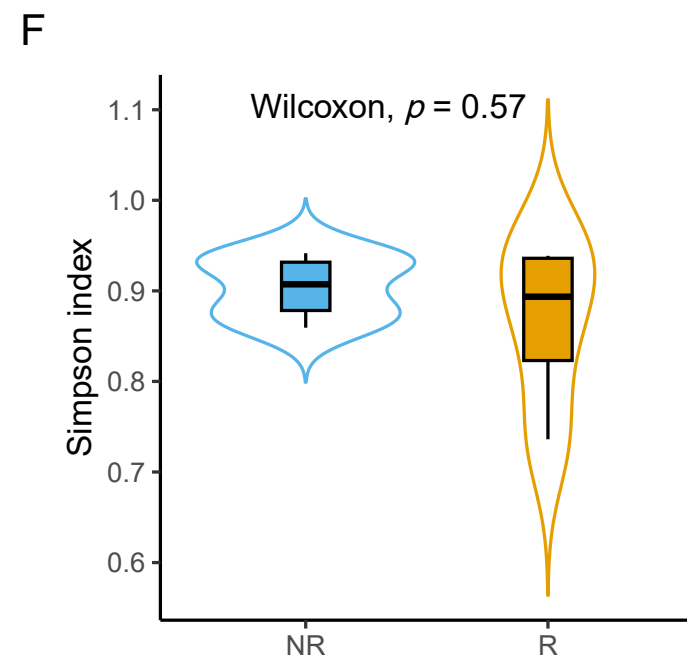

SFig5

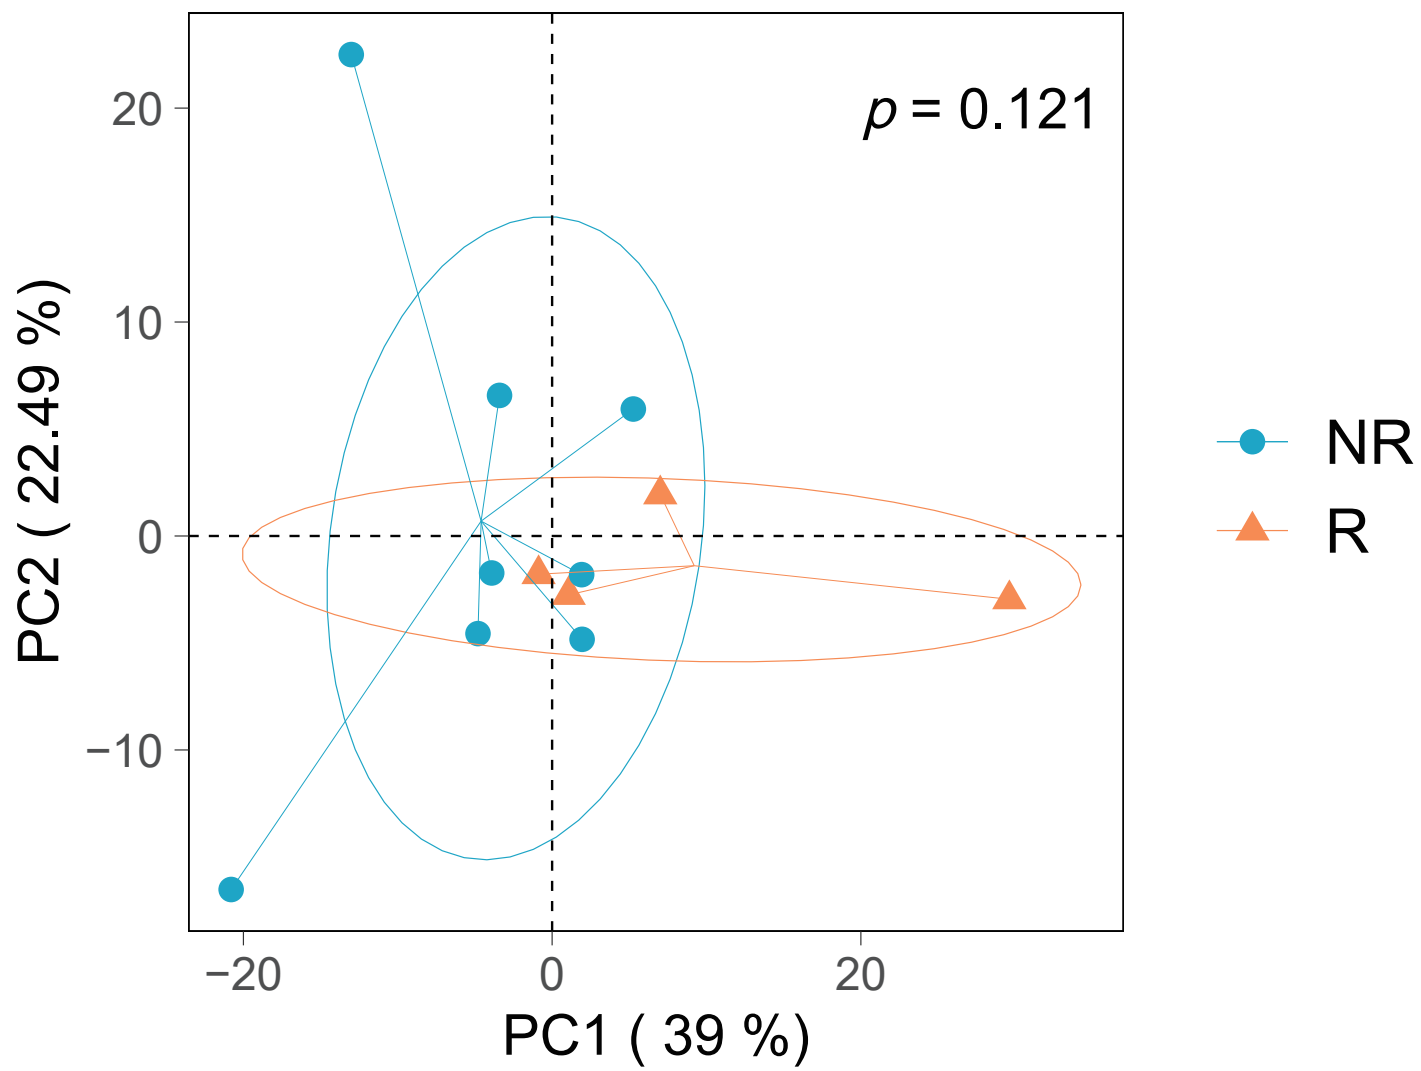

Supplement: 12967_2024_5135_MOESM1_ESM.pdf [file 12967_2024_5135_MOESM1_ESM.pdf]
